# Supplementary material for: An Unbiased Analysis Method to Quantify mRNA Localization Reveals Its Correlation with Cell Motility
Source: PubMed Central journal article supplement — Cell Rep. Author manuscript; Available in PMC 2014 Jul 2. (PMC4079260; doi:10.1016/j.celrep.2011.12.009), 2012-02-16
Supplement: NIHMS605161-supplement-Supplemental_Table_S1.pdf [file NIHMS605161-supplement-Supplemental_Table_S1.pdf]

**Table S1. Yeast Strains, Related to Figure 1**

---

| Strain | Genotype                                                                | Source     |
|--------|-------------------------------------------------------------------------|------------|
| TT001  | MATa; ura3-52;trp1 $\Delta$ 2;leu2-3_112;his3-11;ade2-1;can1-100        | EUROSCARF  |
| TT040  | TT001, <i>WHI5-GFP:HIS</i> , <i>SPC42-CFP:KAN</i> , <i>she2::hphNT1</i> | This study |

---
